# Supplementary material for: Machine Learning Model Development and Validation for Predicting Outcome in Stage 4 Solid Cancer Patients with Septic Shock Visiting the Emergency Department: A Multi-Center, Prospective Cohort Study
Source: MDPI journal article supplement (doi:10.3390/jcm11237231), 2022-12-05
Supplement: s1 [file s1]

**Supplementary Table S1.** Comparison of the training and test sets.

|                                                    | Training set (n = 627) | Test set (n = 270) | <i>p</i> -Value |
|----------------------------------------------------|------------------------|--------------------|-----------------|
| Age, mean $\pm$ standard deviation, y              | 66.3 $\pm$ 11.6        | 65.1 $\pm$ 11.4    | 0.152           |
| Male, no. (%)                                      | 289 (63.5%)            | 119 (60.7%)        | 0.537           |
| Vital signs, mean $\pm$ standard deviation         |                        |                    |                 |
| Initial systolic blood pressure, mmHg              | 96 $\pm$ 27.5          | 96.5 $\pm$ 26.1    | 0.775           |
| Initial diastolic blood pressure, mmHg             | 59.2 $\pm$ 18.1        | 60 $\pm$ 19.3      | 0.547           |
| Initial heart rate, beats per min                  | 114.2 $\pm$ 25.2       | 113.6 $\pm$ 24.7   | 0.727           |
| Initial respiratory rate, breaths per Min          | 21.4 $\pm$ 5.1         | 21.4 $\pm$ 4.5     | 0.926           |
| Initial body temperature, °C                       | 37.7 $\pm$ 1.3         | 37.8 $\pm$ 1.2     | 0.717           |
| Laboratory findings, median (interquartile range)  |                        |                    |                 |
| White blood cell, 10 <sup>3</sup> /mm <sup>3</sup> | 8.1 (3.1–15)           | 8.2 (2.8–16)       | 0.743           |
| Hemoglobin, g/dL                                   | 10.3 (8.6–11.7)        | 9.9 (8.4–11.6)     | 0.077           |
| Platelets, 10 <sup>3</sup> /mm <sup>3</sup>        | 147 (73–238)           | 135 (68–221)       | 0.486           |
| Albumin, g/dL                                      | 2.8 (2.3–3.2)          | 2.8 (2.4–3.2)      | 0.57            |
| Blood urea nitrogen, mg/dL                         | 25 (17.4–39)           | 23.3 (17.2–35.3)   | 0.304           |
| Creatinine, mg/dL                                  | 1.3 (0.9–2)            | 1.2 (0.9–1.8)      | 0.45            |
| C-reactive protein, mg/dL                          | 12.8 (5.9–22.4)        | 12.7 (6.1–21.7)    | 0.562           |
| Lactate, mmol/L                                    | 3.6 (2–5.5)            | 3.7 (2–5.6)        | 0.848           |
| Cancer type, no. (%)                               |                        |                    |                 |
| Stomach                                            | 42 (6.7%)              | 13 (4.8%)          | 0.294           |
| Colorectal                                         | 41 (6.5%)              | 22 (8.1%)          | 0.395           |
| Liver                                              | 84 (13.4%)             | 29 (10.7%)         | 0.276           |
| Biliary                                            | 57 (9.1%)              | 28 (10.4%)         | 0.619           |
| Pancreas                                           | 63 (10%)               | 25 (9.3%)          | 0.807           |
| Lung                                               | 106 (16.9%)            | 45 (16.7%)         | 1.000           |
| Gynecologic                                        | 55 (8.8%)              | 27 (10%)           | 0.614           |
| Urologic                                           | 57 (9.1%)              | 21 (7.8%)          | 0.606           |
| Other                                              | 122 (19.5%)            | 60 (22.2%)         | 0.366           |
| Infection focus, no. (%)                           |                        |                    |                 |
| Lung                                               | 174 (27.8%)            | 82 (30.4%)         | 0.468           |
| Urinary tract infection                            | 108 (17.2%)            | 38 (14.1%)         | 0.278           |
| Gastrointestinal                                   | 110 (17.5%)            | 53 (19.6%)         | 0.509           |
| Hepatobiliary                                      | 187 (29.8%)            | 70 (25.9%)         | 0.26            |
| Bone soft tissue                                   | 17 (2.7%)              | 3 (1.1%)           | 0.149           |
| Others                                             | 27 (4.3%)              | 8 (3%)             | 0.359           |
| Comorbidities, no. (%)                             |                        |                    |                 |
| Hypertension                                       | 208 (33.2%)            | 73 (27%)           | 0.072           |
| Diabetes mellitus                                  | 140 (22.3%)            | 67 (24.8%)         | 0.437           |
| Cardiac disease                                    | 52 (8.3%)              | 25 (9.3%)          | 0.697           |
| Cerebrovascular accident                           | 25 (4%)                | 14 (5.2%)          | 0.475           |
| Chronic lung disease                               | 43 (6.9%)              | 17 (6.3%)          | 0.774           |
| Chronic renal disease                              | 24 (3.8%)              | 9 (3.3%)           | 0.848           |
| Chronic liver disease                              | 56 (8.9%)              | 22 (8.1%)          | 0.796           |
| SOFA score, no. (%)                                | 8 (6-10)               | 8 (6-11)           | 0.897           |
| APACHE II score, no. (%)                           | 20 (15-26)             | 19 (14-26)         | 0.719           |

|                               |             |             |       |
|-------------------------------|-------------|-------------|-------|
| Outcomes, no. (%)             |             |             |       |
| Vasopressor                   | 449 (84.2%) | 204 (88.3%) | 0.148 |
| 28-day mortality, No. (%)     | 166 (26.5%) | 71 (26.3%)  | 1.000 |
| Intensive care unit admission | 292 (46.6%) | 120 (44.4%) | 0.56  |
| Mechanical ventilation        | 127 (20.3%) | 65 (24.1%)  | 0.214 |

APACHE II—Acute Physiology and Chronic Health Evaluation II; SOFA—Sequential Organ Failure Assessment.

**Supplementary Table S2.** Comparison of machine learning models for predicting 28-day mortality in training sets.

|          | <b>LR-bw</b> |         | <b>XGB-bw</b> |         | <b>RF-bw</b> |         | <b>BBC</b> |         | <b>BRF</b> |         |
|----------|--------------|---------|---------------|---------|--------------|---------|------------|---------|------------|---------|
| AUC      | 0.784        | (0.743– | 0.789         | (0.744– | 0.826        | (0.788– | 0.815      | (0.782– | 0.823      | (0.782– |
| (95% CI) | 0.826)       |         | 0.835)        |         | 0.863)       |         | 0.849)     |         | 0.864)     |         |
| F1 score | 0.552        | (0.5–   | 0.583         | (0.518– | 0.392        | (0.299– | 0.572      | (0.513– | 0.604      | (0.548– |
|          | 0.604)       |         | 0.648)        |         | 0.485)       |         | 0.631)     |         | 0.66)      |         |

AUC—area under the curve; BBC—balanced bagging classifier; BRF—balanced random forest classifier; CI—confidence interval; LR-bw—logistic regression with balanced weight; ML—machine learning; RF-bw—random forest classifier with balanced weight; XGB-bw—XGB classifier with balanced weight.

**Supplementary Table S3.** Comparison of ML models for predicting 28-day mortality in test sets.

| Variable 1                  | Variable 2      | Comparison AUC<br>p-value | Bonferroni<br>corrected p-value* |
|-----------------------------|-----------------|---------------------------|----------------------------------|
| LR_bw                       | SOFA score      | 0.0389                    | 0.5836                           |
| LR_bw                       | APACHE II score | 0.0231                    | 0.3472                           |
| LR_bw                       | Lactate1        | 0.0769                    | >.9999                           |
| XGB_bw                      | SOFA score      | 0.0104                    | 0.1561                           |
| XGB_bw                      | APACHE II score | 0.0088                    | 0.1317                           |
| XGB_bw                      | Lactate1        | 0.0267                    | 0.4007                           |
| RF_bw                       | SOFA score      | 0.0002                    | 0.0032                           |
| RF_bw                       | APACHE II score | 0.0002                    | 0.0030                           |
| RF_bw                       | Lactate1        | 0.0005                    | 0.0070                           |
| Balanced Bagging Classifier | SOFA score      | 0.0014                    | 0.0217                           |
| Balanced Bagging Classifier | APACHE II score | 0.0013                    | 0.0195                           |
| Balanced Bagging Classifier | Lactate1        | 0.0026                    | 0.0396                           |
| Balanced Random Forest      | SOFA score      | 0.0001                    | 0.0011                           |
| Balanced Random Forest      | APACHE II score | <.0001                    | 0.0006                           |
| Balanced Random Forest      | Lactate1        | 0.0001                    | 0.0022                           |

\* Adjustment for 15 pairs of tests

AUC—area under the curve; BBC—balanced bagging classifier; BRF—balanced random forest classifier; CI—confidence interval; LR-bw—logistic regression with balanced weight; ML—machine learning; RF-bw—random forest classifier with balanced weight; XGB-bw—XGB classifier with balanced weight.

**Figure S1.** The AUC of BRF with 10-fold validation in the training set. Abbreviations: AUC—area under the curve; BRF—balanced random forest.

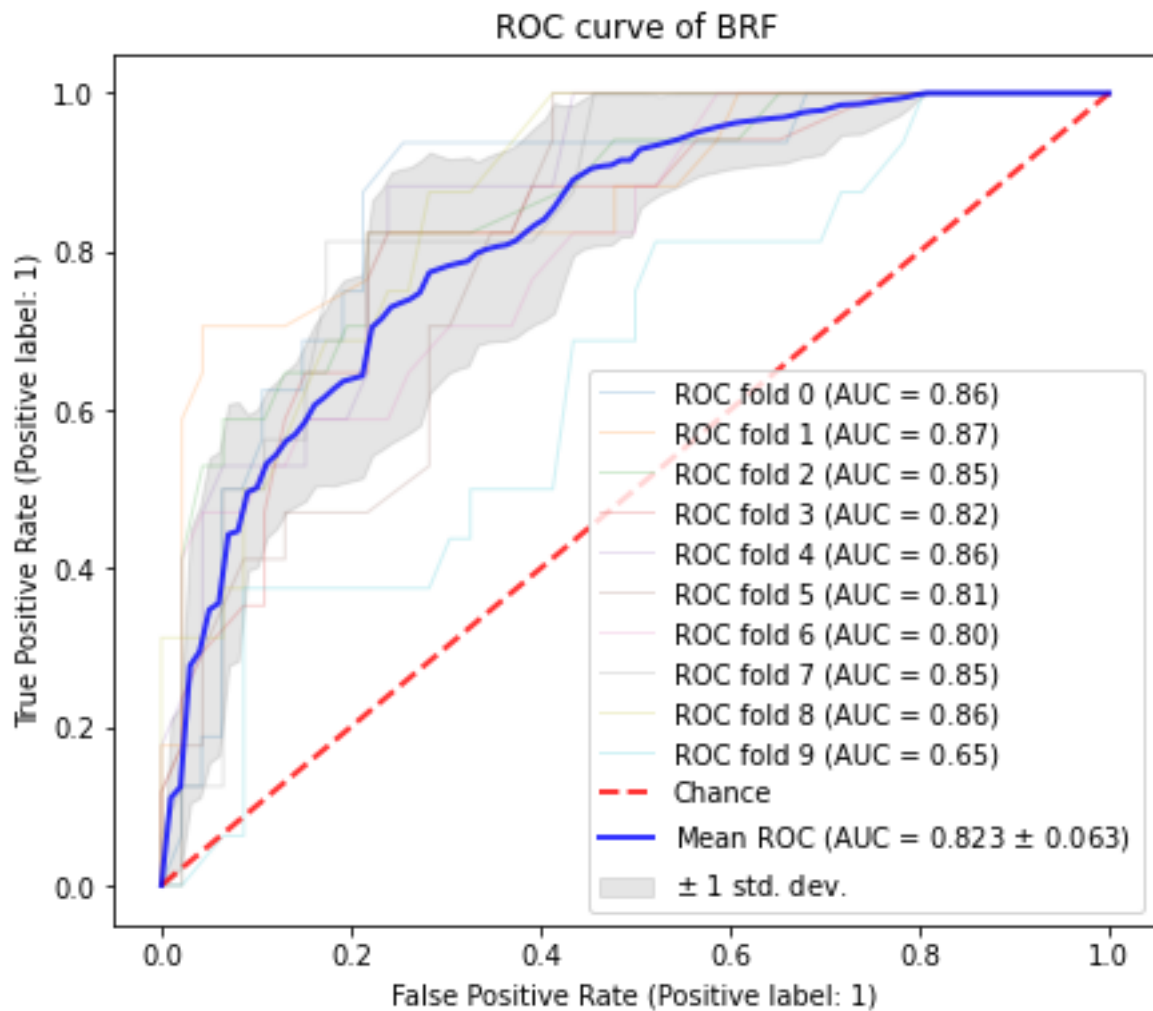

**Figure S2.** The AUC of ML models for predicting 28-day mortality in the test set. Abbreviations: AUC—area under the curve; BBC—balanced bagging classifier; BRF—balanced random forest classifier; CI—confidence interval; LR-bw—logistic regression with balanced weight; ML—machine learning; RF-bw—random forest classifier with balanced weight; XGB-bw—XGB classifier with balanced weight.

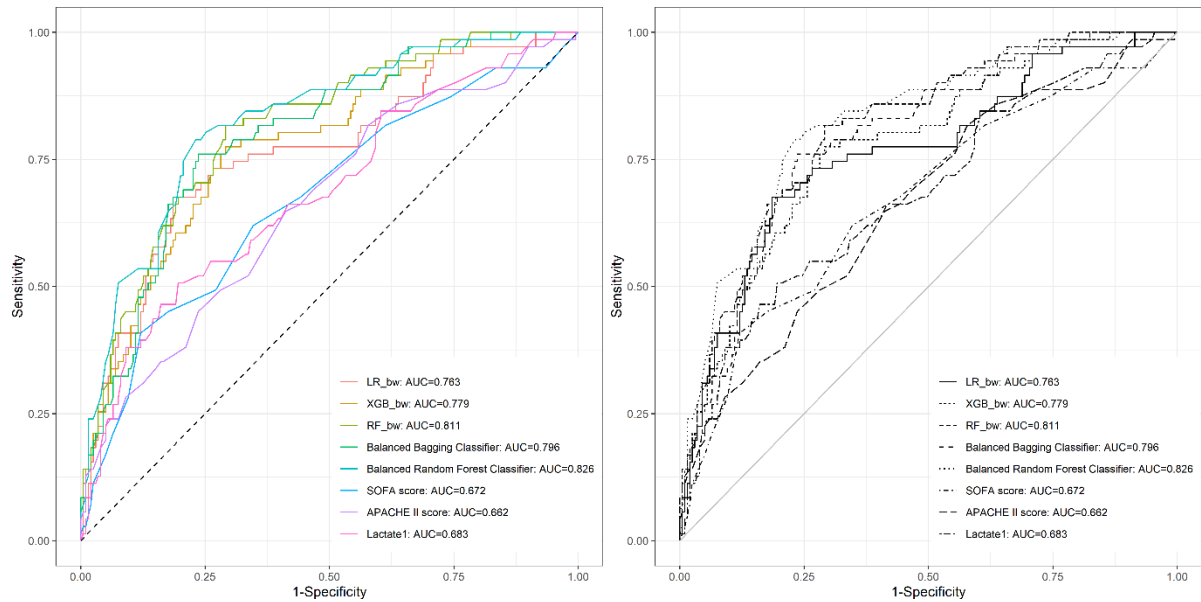

**Figure S3.** Calibration curve of the ML model, SOFA, APACHE II and initial lactate level for 28-day mortality in the test set. Abbreviations: BRF—balanced random forest; ML—machine learning; SOFA—Sequential Organ Failure Assessment; APACHE—Acute Physiology and Chronic Health Evaluation.

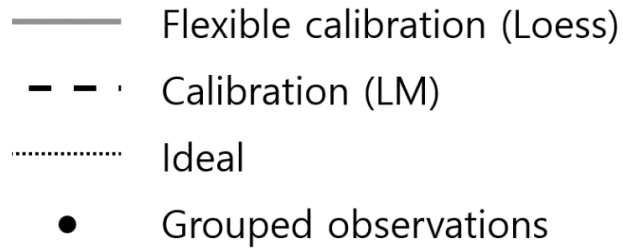

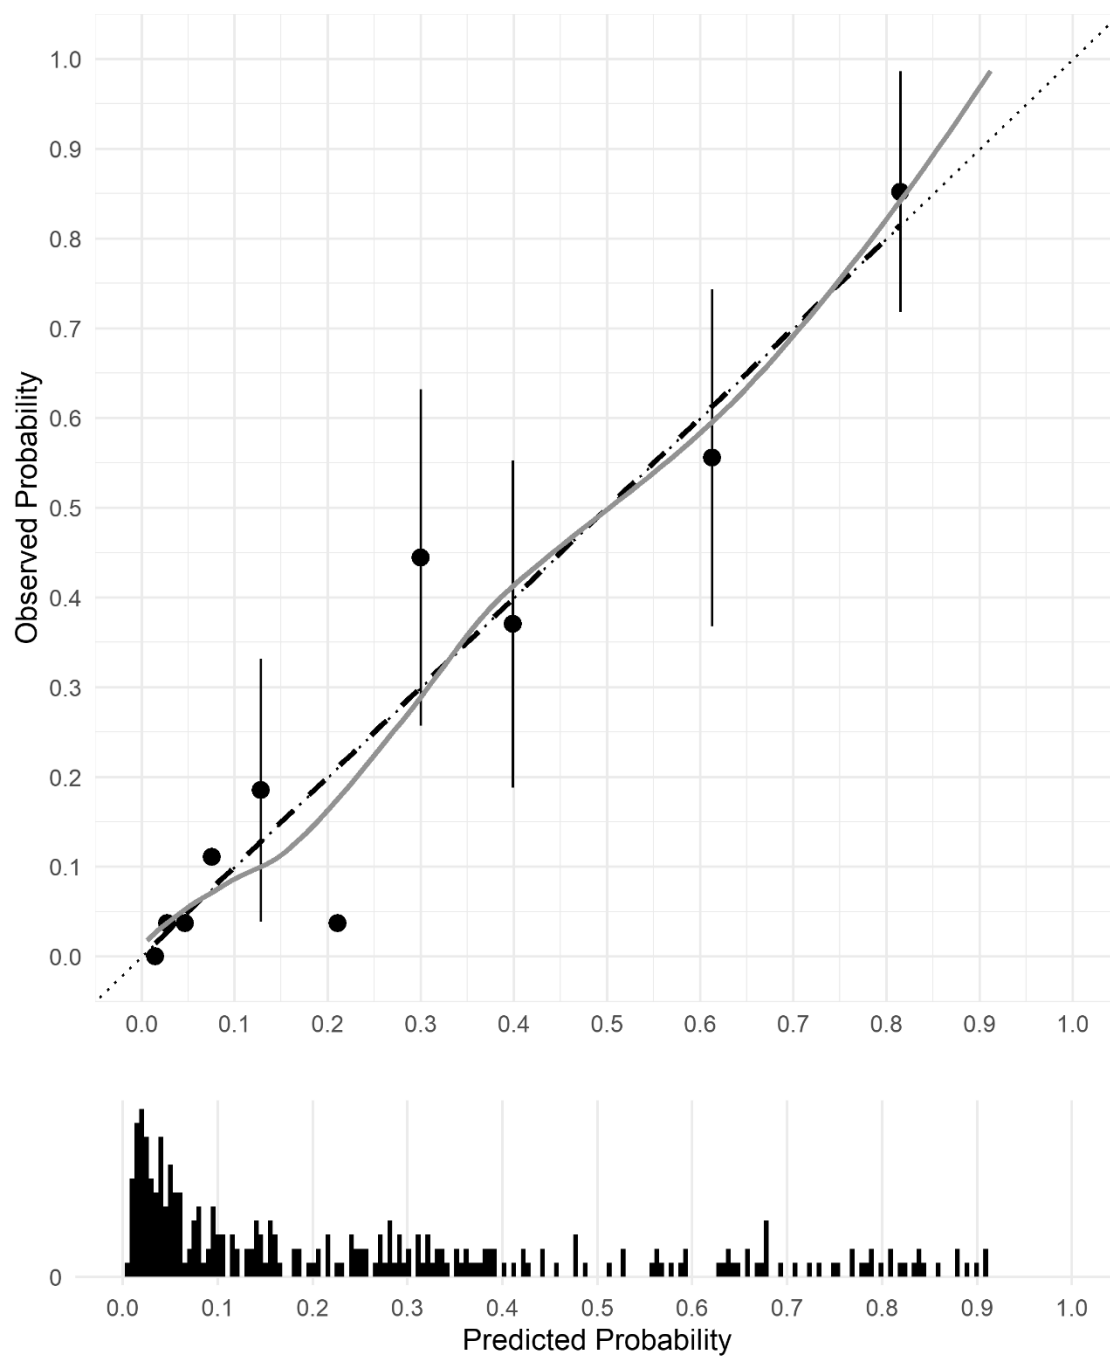

**ML (BRF)**



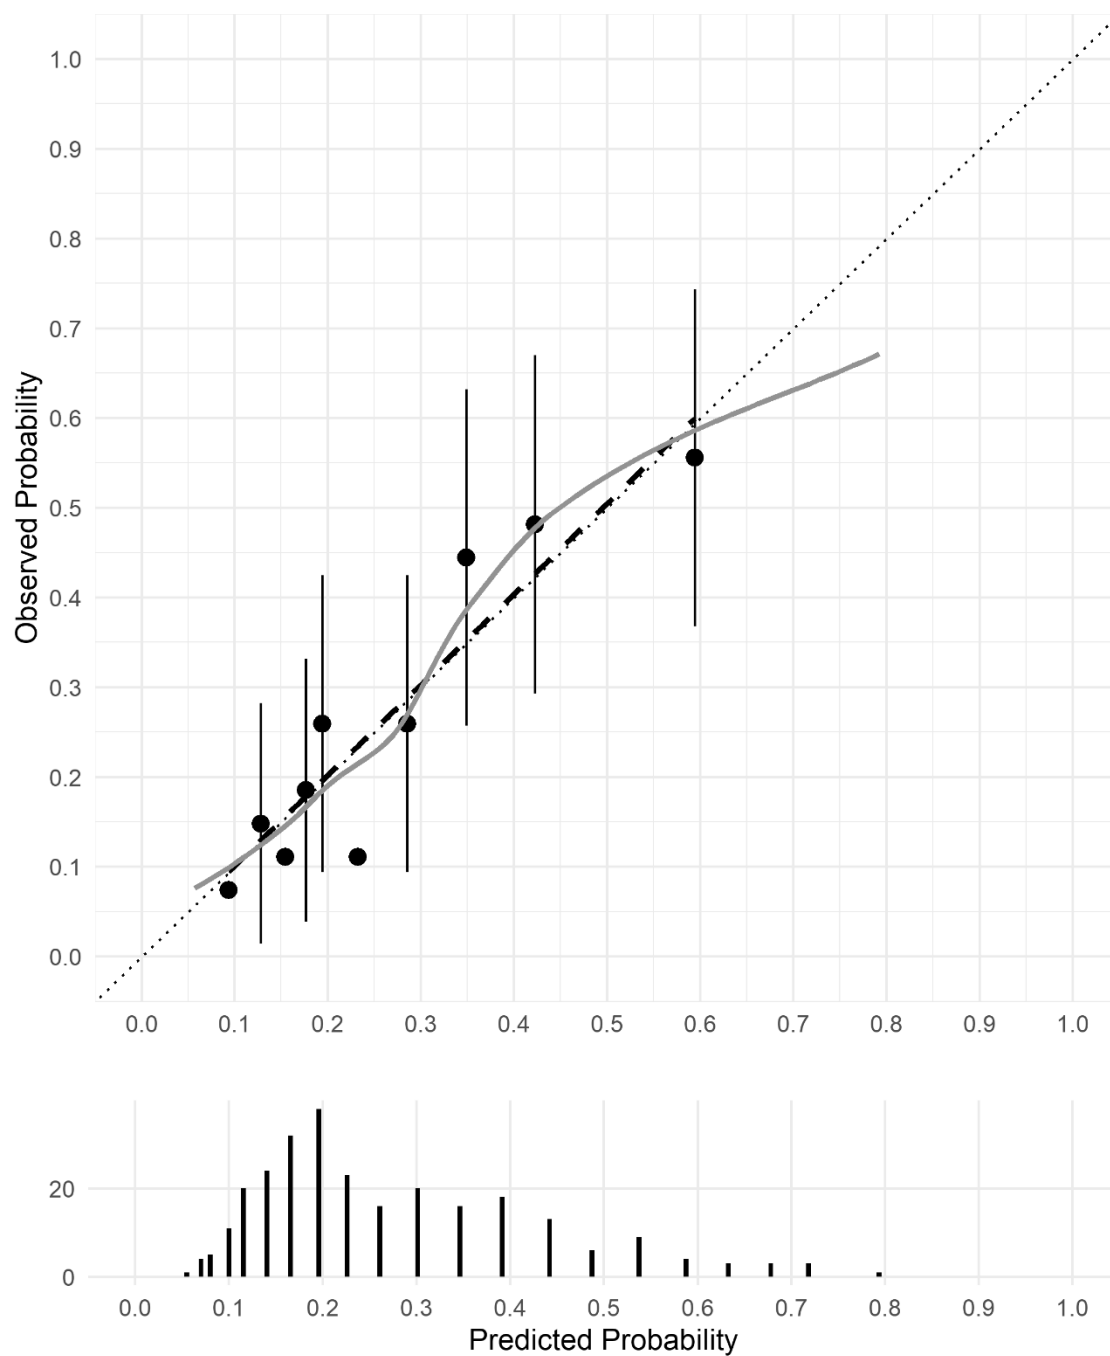

**SOFA score**

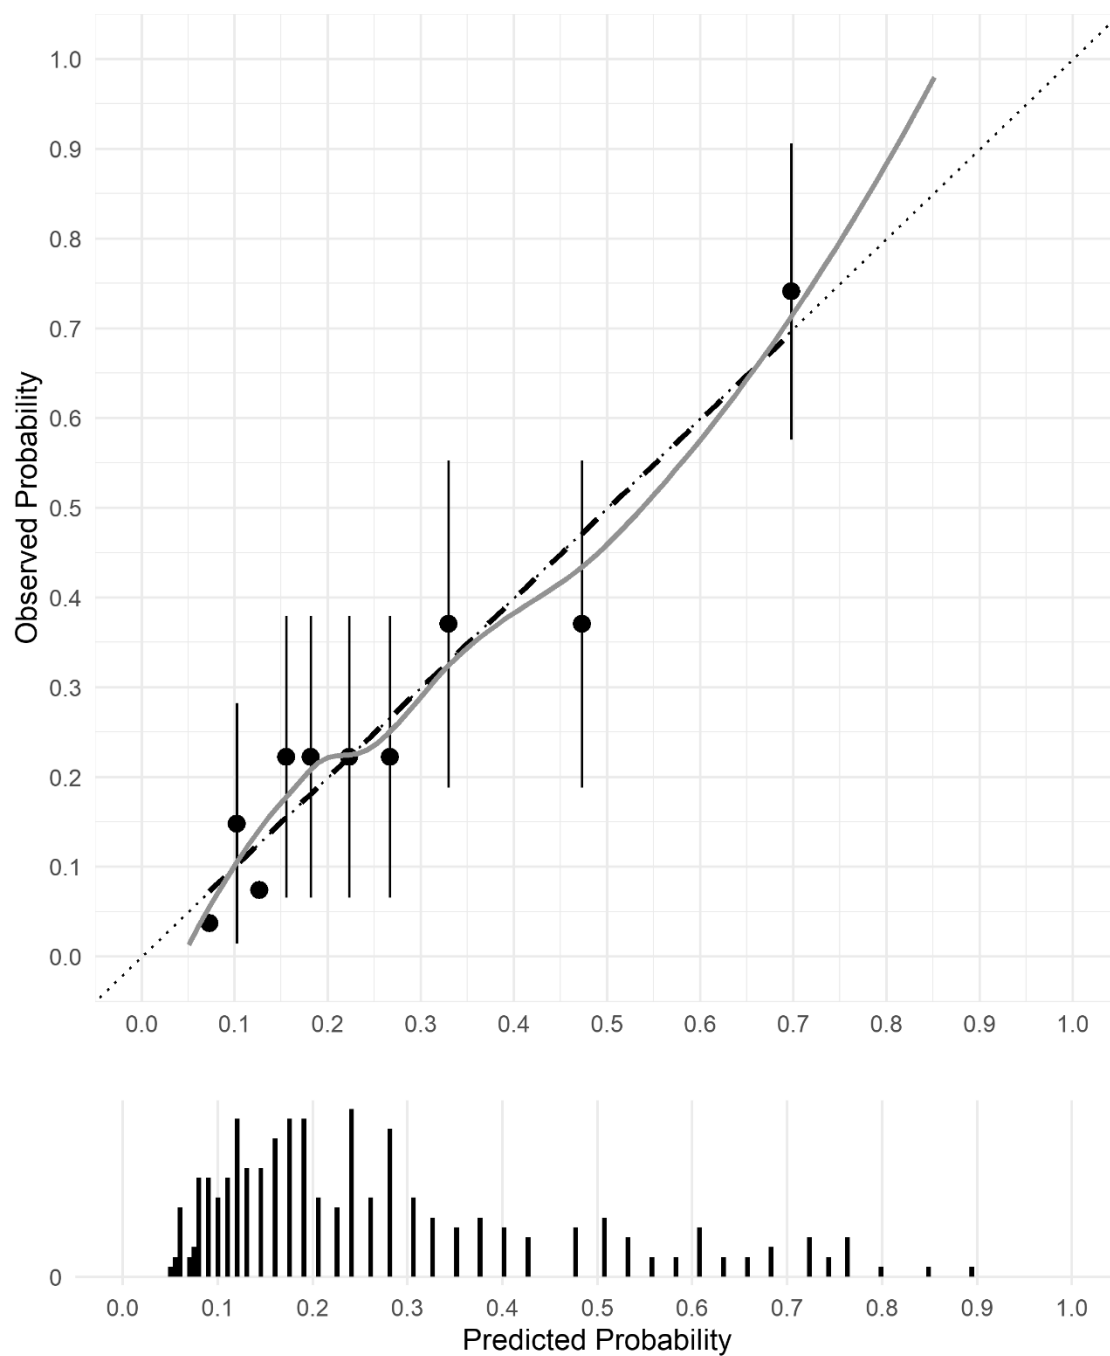

**APACHE II score**

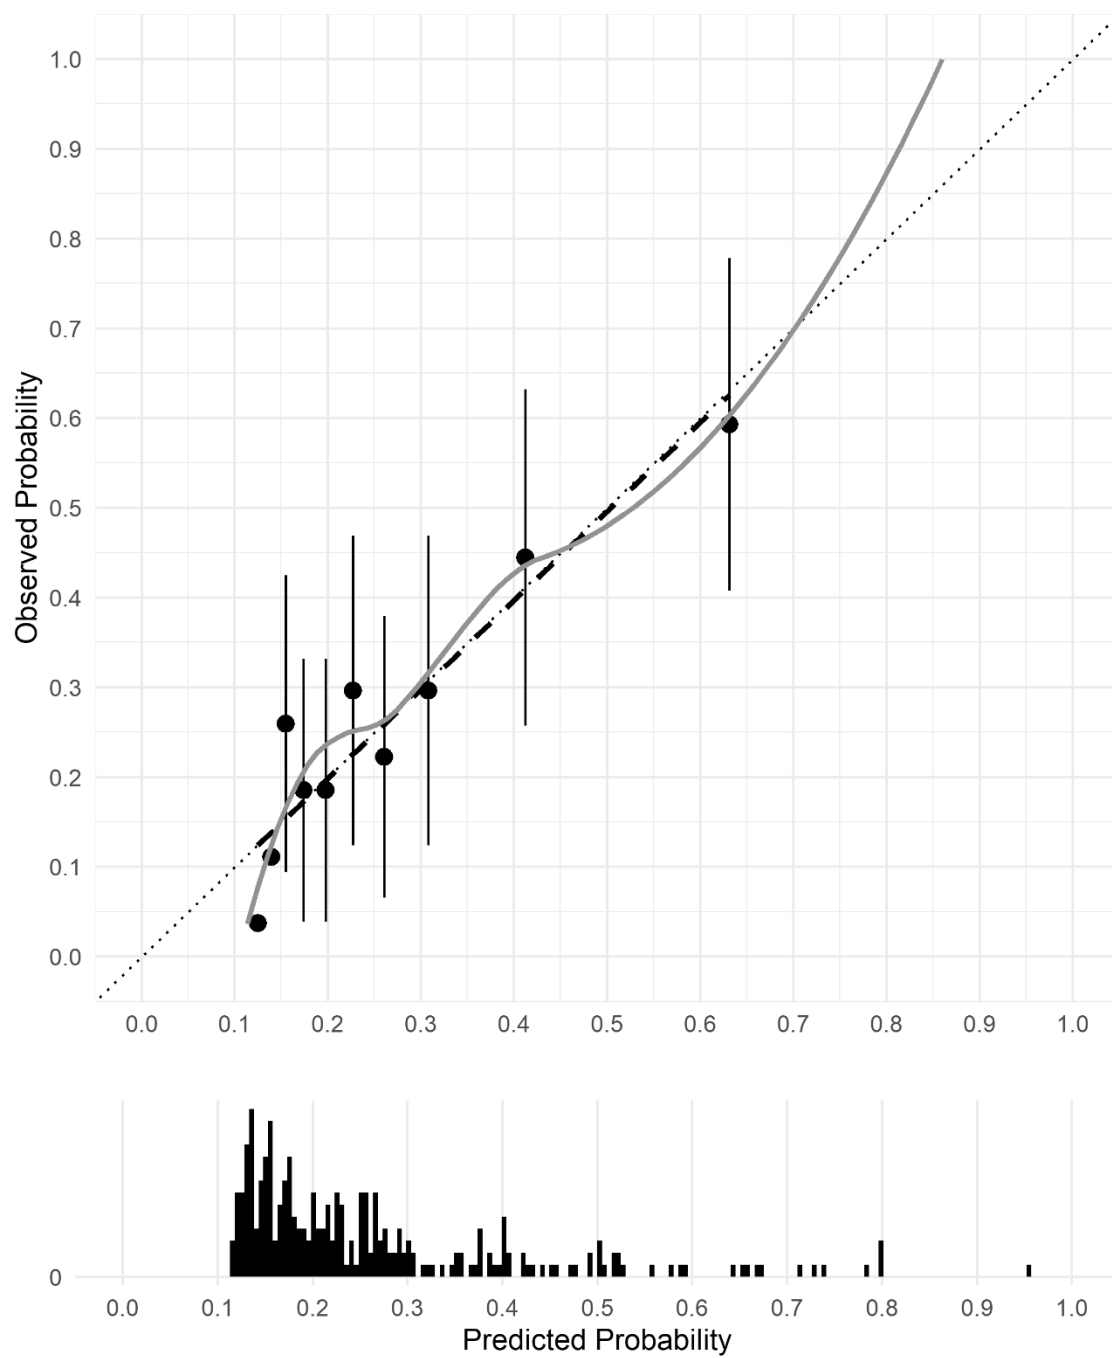

**Initial lactate level**
